# Supplementary material
Source: MDPI journal article supplement (https://www.mdpi.com/2073-4441/12/6/1826)
Supplement: s1 [file s1]

Prediction of Children's Blood Lead Levels from Exposure to Lead in Schools' Drinking Water—A Case Study in Tennessee, USA

Dave DeSimone, Donya Sharafoddinzadeh and Maryam Salehi *

Department of Civil Engineering, The University of Memphis, 3815 Central Avenue, 108 C Engineering Science Building, Memphis, TN 38152, USA; ddsmone1@memphis.edu (D.D.); dshrfddn@memphis.edu (D.S.)

* Correspondence**:** mssfndrn@memphis.edu

**Supplemental File Contents**

1. School Population Data

2. Lead Mitigation in Secondary Schools – Examples

2.1 Example 1 – Secondary school drinking water lead concentration held constant

2.2 Example 2 – Secondary school soil lead concentration held constant

1. School Population Data

**Table S1.** Populations of Students at Sampled Schools.

|  | **Elementary Schools** | | **Middle Schools** | | **High Schools** | |
| --- | --- | --- | --- | --- | --- | --- |
| **2017** | **2019** | **2017** | **2019** | **2017** | **2019** |
| Schools sampled | 39 | 99 | 17 | 25 | 14 | 36 |
| Total student population | 22,618 | 52,125 | 8,621 | 16,865 | 17,735 | 27,616 |

2. Lead Mitigation in Secondary Schools—Examples

2.1. Example 1—Secondary School Drinking Water Lead Concentration Held Constant

Assume two students enter a secondary school that has an average water lead concentration of 10 μg/L. Student 1 has a baseline BLL of 2.35 μg/dL (the geometric mean from scenario A). Student 2 has a baseline BLL of 0.99 μg/dL (the geometric mean from scenario B). If both students are exposed to soil with lead concentration of 260 μg/g during secondary school (the 90th percentile value), Bowers' model predicts that Student 1 has a 15% chance of being at risk of an elevated BLL whereas Student 2 has a 1% chance [7]. On the other hand, if both students are exposed to soil with lead concentration of 52 μg/g during secondary school (the median value), Student 1 has a 14% chance of being at risk whereas Student 2 has a 1% chance. In essence, the gap between the two students did not shrink substantially when mitigating soil lead exposure during secondary school. The individual risk decreased slightly for Student 1, but the large difference between the two students remained.

2.2. Example 2—Secondary School Soil Lead Concentration Held Constant

The previous relationship is also present when altering the average water lead concentration while the soil lead concentration is held constant during secondary school. In this example, the two students are exposed to the median soil lead concentration (52 μg/g) during secondary school. They enter a secondary school that is considering a lead remediation program for its drinking water. If the program is not put into place, both students would be subjected to the secondary school's current average water lead concentration of 25 μg/L. In this case, Bowers' model projects Student 1 (having a baseline BLL of 2.35 μg/dL like in the previous example) to have a 17% chance of being at risk of an elevated BLL whereas Student 2 (having a baseline BLL of 0.99 like in the previous example) to have a 2% chance of being at risk [7]. If the lead remediation program is put in place, both students would be subjected to the secondary school's projected average water lead concentration of 5 μg/L. In this case, Student 1 would have a 13% chance of being at risk of an elevated BLL whereas Student 2 would have a have a 1% chance of being at risk. Again, as was the case in Example 1, the gap between the two students does not shrink substantially when mitigating lead exposure during secondary school. The individual risk decreased only slightly for each student but the large difference between the two students remained.
